# Supplementary material
Source: PubMed Central journal article supplement (PMC4484602)
Supplement: NIHMS702018-supplement-Figure_S1.pdf [file NIHMS702018-supplement-Figure_S1.pdf]

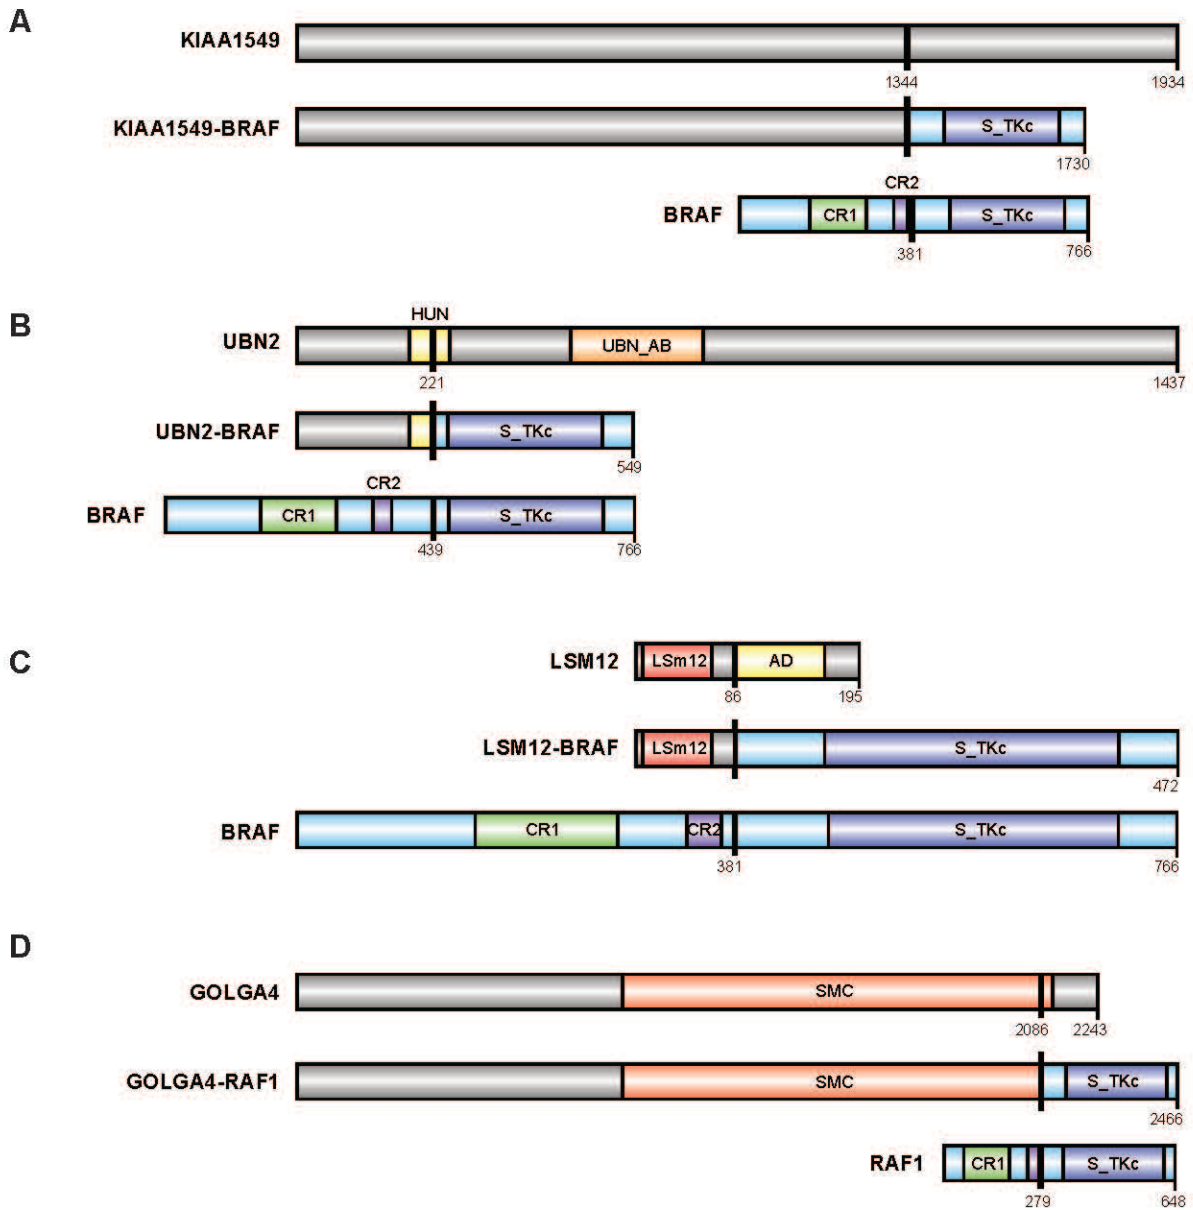

**Figure S1.**  
**Schematic representations of the predicted BRAF and RAF1 gene fusions identified by transcriptome sequencing, Related to Figure 2.**

Each panel illustrates the protein domains encoded by the 5' and 3' genes of the fusion, with the predicted fusion protein illustrated in between. A, KIAA1549 ex10-BRAF ex9 (NM\_020910, NM\_004333); B, UBN2 ex3-BRAF ex11 (NM\_173569, NM\_004333); C, LSM12 ex3-BRAF ex9 (NM\_152344, NM\_004333); D, GOLGA4 ex17-RAF1 ex8 (NM\_001172713, NM\_002880). LSm12=Like Sm12 domain, AD=anticodon binding domain, S\_TKc=serine/threonine kinase domain, CR1=conserved region 1, CR2=conserved region 2, HUN=HPC2-Ubinuclein-1 domain, UBN-AB, ubinuclein conserved middle domain, Smc=chromosome segregation ATPases conserved domain.
