# Supplementary material
Source: PubMed Central journal article supplement (PMC4484602)
Supplement: NIHMS702018-supplement-Figure_S2.pdf [file NIHMS702018-supplement-Figure_S2.pdf]

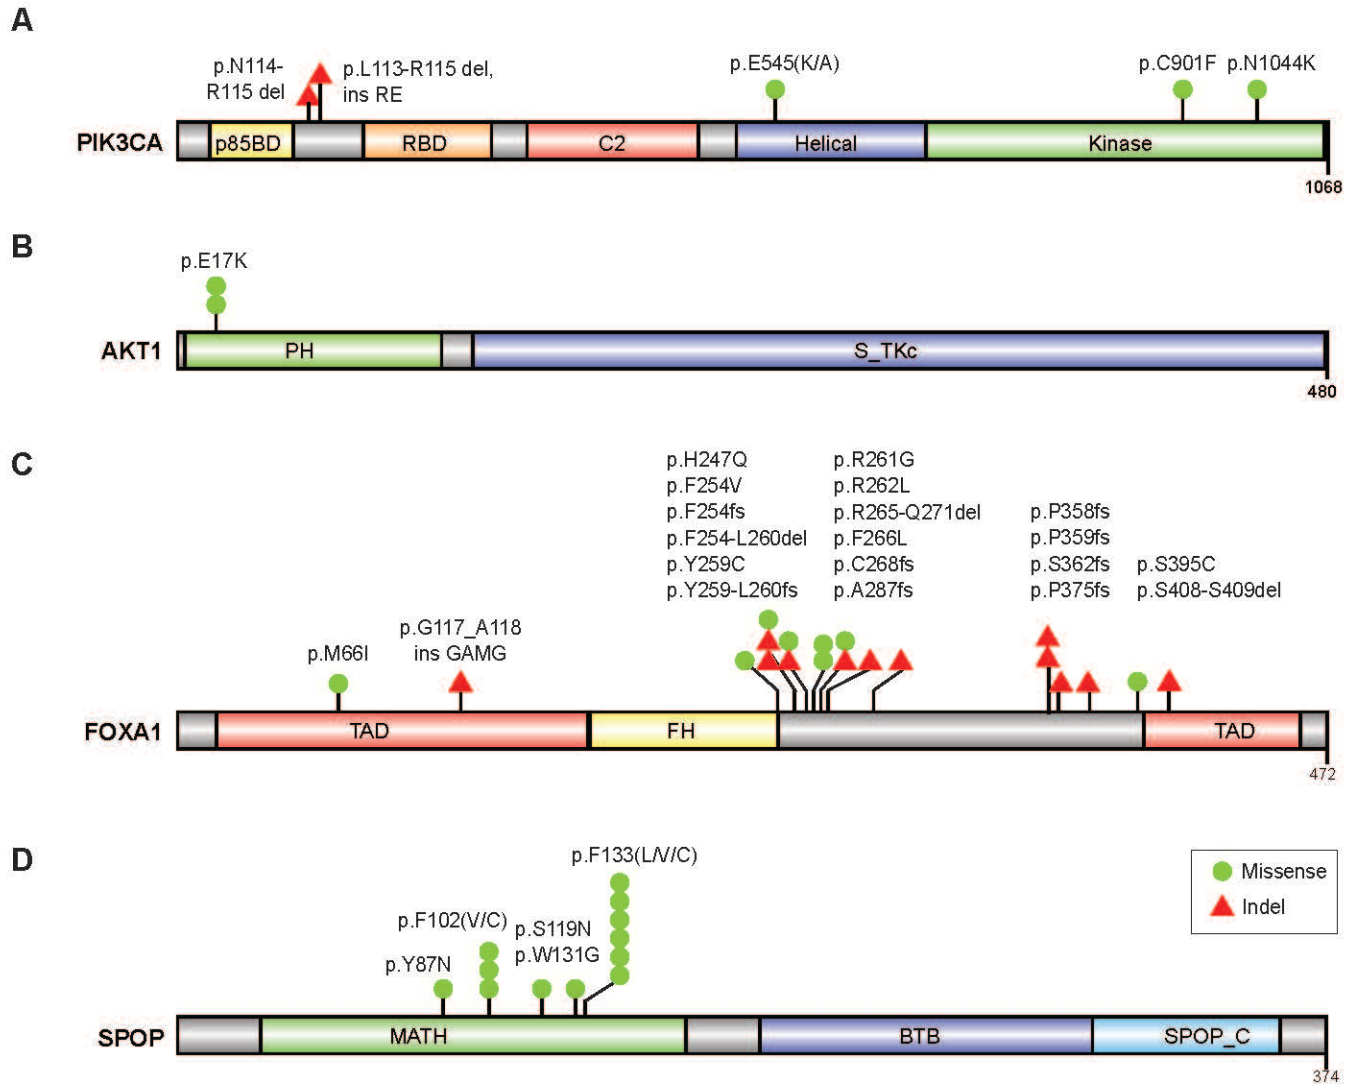

**Figure S2.**  
**Mutations identified in CRPC, Related to Figures 4 and 5.**

Schematics of protein changes in PIK3CA (A), AKT1 (B), FOXA1 (C), and SPOP (D). The red triangles represent Indels, including insertions and deletions. The green circles represent missense mutations. ABD=adaptor-binding domain that binds to p85, RBD=Ras-binding domain, C2=putative membrane-binding domain, PH=Pleckstrin homology domain, S\_TKc=serine/threonine kinase domain, TAD=transactivation domain, FH=Forkhead Winged Helix DNA binding domain, MATH=meprin and TRAF homology domain, BTB=BTB-POZ domain.
