# Supplementary material
Source: PubMed Central journal article supplement (PMC4484602)
Supplement: NIHMS702018-supplement-Figure_S3.pdf [file NIHMS702018-supplement-Figure_S3.pdf]

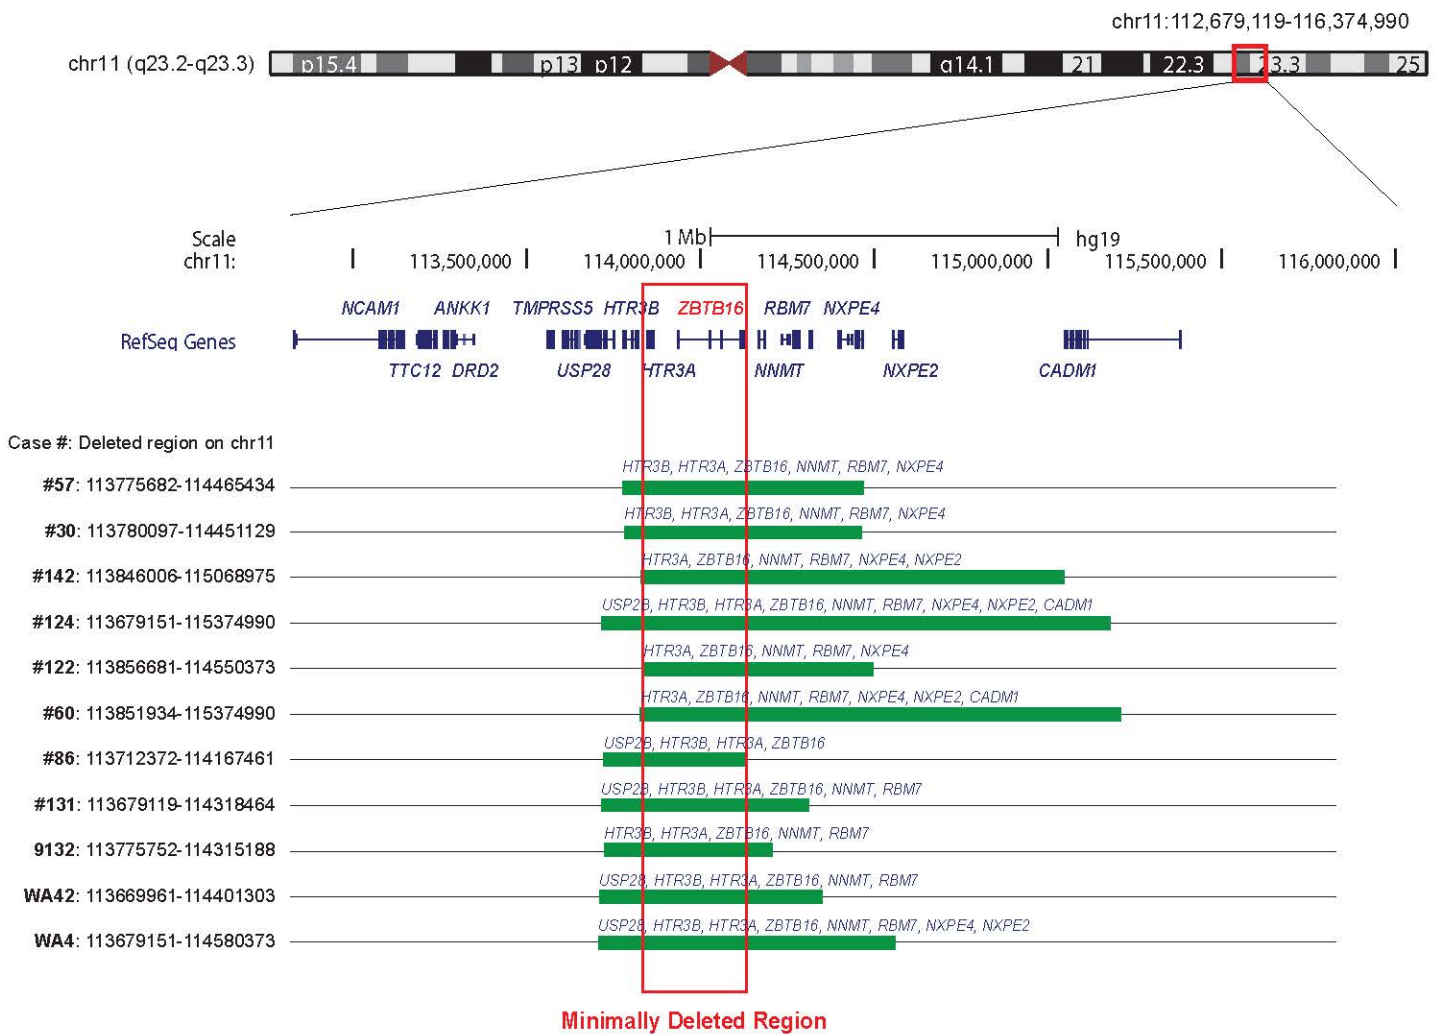

**Figure S3.**

**Physical map of the deleted regions on chr11 in mCRPC cases harboring ZBTB16 homozygous deletion, Related to Figure 4.**

Close-up of the boxed region in the whole chromosome view shows the distribution of genes located in this region. Green bars represent the deleted regions in indicated cases. The red box marks the minimal deleted region shared by all the index cases. Additional cases WA42 and WA4 are from lethal castrate-resistant prostate cancer cohort in Grasso et al. (Nature 487, 2012).
