# Supplementary material
Source: PubMed Central journal article supplement (PMC4484602)
Supplement: NIHMS702018-supplement-Figure_S4.pdf [file NIHMS702018-supplement-Figure_S4.pdf]

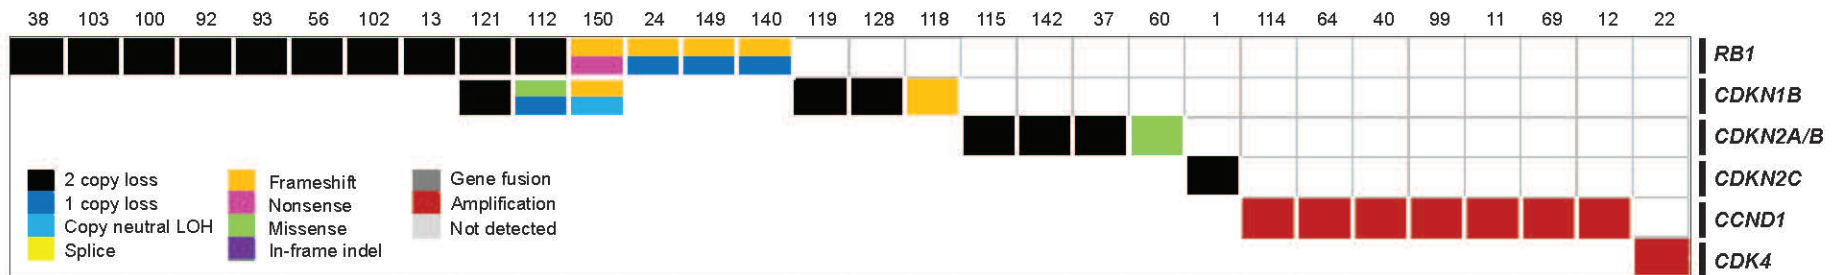

**Figure S4.**  
**Aberrations in the cell cycle pathway identified in mCRPC, Related to Figure 2.**  
 Numbering and color keys are the same as in Figure 2.
